# ***APOE* $\epsilon$ 4 allele accelerates age-related multi-cognitive decline and white matter damage in non-demented elderly**

Jinping Sun<sup>1,\*</sup>, Zhibao Zhu<sup>4,\*</sup>, Kewei Chen<sup>5</sup>, Dongfeng Wei<sup>3,6</sup>, Xin Li<sup>2,3</sup>, He Li<sup>3,6</sup>, Junying Zhang<sup>3,6</sup>, Xiaochun Chen<sup>4</sup>, Yaojing Chen<sup>2,3</sup>, Zhanjun Zhang<sup>2,3</sup>

<sup>1</sup>Department of Neurology, The Affiliated Hospital of Qingdao University, Qingdao, Shandong, China

<sup>2</sup>State Key Laboratory of Cognitive Neuroscience and Learning, Beijing Normal University, Beijing, China

<sup>3</sup>BABRI Centre, Beijing Normal University, Beijing, China

<sup>4</sup>Department of Neurology, and Fujian Key Laboratory of Molecular Neurology, Fujian Medical University Union Hospital, Fuzhou, Fujian, China

<sup>5</sup>Banner Alzheimer's Institute, Phoenix, AZ 85006, USA

<sup>6</sup>Institute of Basic Research in Clinical Medicine, China Academy of Chinese Medical Sciences, Beijing, China

\*Equal contribution

**Correspondence to:** Zhanjun Zhang, Yaojing Chen, Xiaochun Chen; **email:** [zhang\\_rzs@bnu.edu.cn](mailto:zhang_rzs@bnu.edu.cn), [chenyaojing@bnu.edu.cn](mailto:chenyaojing@bnu.edu.cn), [chenxc998@fjmu.edu.cn](mailto:chenxc998@fjmu.edu.cn)

**Keywords:** Alzheimer's disease, apolipoprotein E, aging, cognition, white matter

**Received:** February 8, 2020

**Accepted:** May 1, 2020

**Published:** June 22, 2020

**Copyright:** Sun et al. This is an open-access article distributed under the terms of the Creative Commons Attribution License (CC BY 3.0), which permits unrestricted use, distribution, and reproduction in any medium, provided the original author and source are credited.

## **ABSTRACT**

**Advanced age and apolipoprotein E (*APOE*)  $\epsilon$ 4 allele are both associated with increased risk of the Alzheimer's disease (AD). However, the extent of the joint contribution of *APOE*  $\epsilon$ 4 allele and age on the brain white matter integrity, cognition and their relationship are unclear. We assessed the age-related variation differences of major cognitions in 846 non-demented elderly, and brain major white matter tracts in an MRI sub-cohort of 111 individuals between  $\epsilon$ 4 carriers and noncarriers. We found that: (i) carriers showed a steeper age-related decline after age 50 in general mental status, attention, language, and executive function and performed worse than noncarriers at almost all ages; (ii) main effect of age on anterior fibers, but main effect of *APOE*  $\epsilon$ 4 on posterior fibers, and the interactive effect of them existed on anterior and posterior fibers; (iii) carriers showed an accelerated age-related integrity reduction of these fibers compared to noncarriers who had a slight decrease but not significant; and (iv) significant associations of the higher white matter integrity with better multi-cognitive performance in old  $\epsilon$ 4 carriers. Overall, combining *APOE* status with age may be useful in assessing possible mechanisms of disease development in AD.**

## **INTRODUCTION**

Alzheimer's disease (AD) is characterized by complicated pathologic process and lengthy preclinical and clinical courses. Abundant evidence supports that the intervention in advanced, later stage of AD is ineffective. Consequently, investigations of preclinical AD phase have attracted more attention. Viewed by many, AD is a severe neurodegenerative disease caused by or related to multiple genetic and environmental

factors [1]. Among these risk factors, the apolipoprotein E (*APOE*)  $\epsilon$ 4 allele is a well-established one. Comparing with  $\epsilon$ 4 allele noncarriers, individuals carrying one copy of  $\epsilon$ 4 allele had 2- to 3-fold, individuals carrying two copies of  $\epsilon$ 4 allele had about 12-fold AD risk [2]. A previous longitudinal study has demonstrated that cognitive normal  $\epsilon$ 4 carriers started age-related memory decline before 60 years old [3]. On the other hand, increasing age has always been the greatest risk factor of AD [4] regardless of genetic

makeup though influence of which on aging has been an interesting research topic for many. Therefore, the illustration of the joint impact of age and *APOE*  $\epsilon 4$  allele on different domains of advanced cognitive function and its potential neuromechanism have become the focus of many researchers.

As the most important apolipoprotein in the brain, the ApoE protein is the crucial carrier of cholesterol, which played an important role in the formation, development and repair of myelin, neuron membrane and axon. The microstructural damage of white matter is a significant independent factor of AD [5–7]. Mounting evidence showed that the ApoE protein is related with axonal degeneration and structural damage in microtubules [8, 9], therefore the *APOE* polymorphism may be participated in white matter integrity. The older ages have increased level of lipid peroxidation and myelin breakdown [10] compare to the younger ones in healthy individuals, while AD patients have more myelin breakdown than normal control [11]. The association between *APOE* status and the severity and rate of myelin breakdown may suggest that *APOE* genotype contributes to the onset of AD [12]. Bartzokis et al.'s later study proved that *APOE* genotype caused age-related slowing in cognitive processing speed by impacting myelin breakdown, and eventually shifted the age at onset of cognitive decline [13]. One recent study showed that relative to  $\epsilon 3$  homozygotes,  $\epsilon 4$  carriers showed faster executive function decline with age, even after exclusion of individuals with evidence of cognitive impairment [14].

Previous studies have suggested that cognitive measures and brain indices are strongly influenced by genetic factors [15], and such impact continuously was enhanced with aging [16, 17]. A growing body of evidence has also been supporting that *APOE*  $\epsilon 4$  impairs the integrity of white matter (WM) fibers [18]. Advanced age is an unavoidable factor in AD. Therefore, identifying joint contribution of *APOE*  $\epsilon 4$  allele and age on the brain and cognition could have a profound impact on our understanding of the underlying process that influences brain function in disease. Operto et al. found a significant negative interaction between the number of *APOE*  $\epsilon 4$  alleles and age in extensive bilateral regions of the WM in both the recessive and the additive contrast [19]. However, does the *APOE*  $\epsilon 4$  allele moderate age-related changes in WM fibers integrity? Furthermore, what is the effect of *APOE*  $\epsilon 4$  - age interactions on the white matter - cognitive relationship? In this study, we examined the effects of advancing age on multi-cognition domains and white matter integrity in non-demented *APOE*  $\epsilon 4$  carriers and noncarriers. Our goals

were to (i) document age-related changes in different cognitive domains and white matter integrity in  $\epsilon 4$  carriers and noncarriers respectively, (ii) for each cognitive function, further estimate the age trajectories by using best-fitting regression models for carriers and noncarriers respectively, (iii) determine if gene-by-age interactions influence the relationship between cognition and white matter integrity.

## RESULTS

### Cognitive performance change with age

Characteristics and neuropsychological test scores of two groups are shown in Table 1. Age ranged from 48 to 87 years, with a mean of  $64.90 \pm 7.39$  for carriers and  $65.18 \pm 7.34$  for noncarriers. No differences in gender, education or mild cognitive impairment (MCI) proportion were found between carriers and noncarriers. There also no differences in hypertension, hyperlipidemia, diabetes, coronary heart disease, cerebrovascular disease, and family history of dementia proportion between *APOE* the performance of  $\epsilon 4$  carriers in the Mini-Mental State Examination (MMSE) was significantly worse than that of non-carriers ( $p=0.001$ ). Among the cognitive scores, all showed a significant age effect ( $p<0.05$ ). Moreover, the *APOE*  $\epsilon 4$  allele had an interactive effect with age significantly on MMSE ( $p=0.011$ ) and visuo-spatial ability ( $p=0.006$ ), and language ( $p=0.028$ ).

Age-associated cognitive curves for global measures, memory, attention, visuo-spatial processing, executive function and language ability were evaluated in *APOE*  $\epsilon 4$  carriers and noncarriers respectively. Best-fitting regression models were used. For carriers, age-related MMSE (regression coefficient  $\beta=-0.000458$ ,  $p=0.0312$ ), attention ( $\beta=-0.000271$ ,  $p<0.0001$ ) and executive function ( $\beta=-0.001$ ,  $p<0.0001$ ) changes tended to be quadratic rather than linear or sigmoid and language ( $p=0.023$ ) tended to be sigmoid, but the effects of age on memory and visuospatial were not statistically significant in carriers ( $p>0.05$ ). For noncarriers, the quadratic effect of age on MMSE ( $\beta=-0.002786$ ,  $p<0.0001$ ), memory ( $\beta=-0.001388$ ,  $p<0.0001$ ), language ( $\beta=-0.001536$ ,  $p<0.0001$ ), attention ( $\beta=-0.00061$ ,  $p<0.0001$ ), visuospatial ( $\beta=-0.00165$ ,  $p<0.0001$ ) and executive function ( $\beta=-0.000711$ ,  $p<0.0001$ ) with the best-fitting regression was highly significant (Figure 1). Critical age for carriers and noncarriers were identified by the extreme points of curves separately. The age-related MMSE, language, attention, and executive function decline in carriers changes steeply after age 50. However, most of the cognitive domains began to decline around age 60 in noncarriers, at the ages of 58.7 for MMSE and language, 56.3 for memory, and 60.8 for

**Table 1. Demographic characteristics and neuropsychological test of all sample participants.**

|                                | <i>APOE</i> ε4 carriers (n=129) | <i>APOE</i> ε4 noncarriers (n=717) | Main <i>APOE</i> ε4 effect | Main age effect | Age× <i>APOE</i> ε4 interaction |
|--------------------------------|---------------------------------|------------------------------------|----------------------------|-----------------|---------------------------------|
| Male/Female                    | 47/82                           | 264/453                            | 1 <sup>a</sup>             |                 |                                 |
| Age (years)                    | 64.90±7.39                      | 65.18±7.34                         | 0.69                       |                 |                                 |
| Education (years)              | 11.08±3.61                      | 10.82±3.67                         | 0.47                       |                 |                                 |
| MCI (Y/N)                      | 23/106                          | 97/620                             | 0.22 <sup>a</sup>          |                 |                                 |
| Hypertension (%)               | 51 (39.5%)                      | 296 (41%)                          | 0.83 <sup>a</sup>          |                 |                                 |
| Hyperlipidemia (%)             | 69(53.4%)                       | 327 (45.6%)                        | 0.205 <sup>a</sup>         |                 |                                 |
| Diabetes (%)                   | 12 (9.3%)                       | 116 (16.2%)                        | 0.107 <sup>a</sup>         |                 |                                 |
| Coronary heart disease (%)     | 7 (5.4%)                        | 82 (11.4%)                         | 0.112 <sup>a</sup>         |                 |                                 |
| Cerebrovascular disease (%)    | 15 (11.6%)                      | 86 (12%)                           | 1 <sup>a</sup>             |                 |                                 |
| Family history of dementia (%) | 3 (2.3%)                        | 10 (13.9%)                         | 0.332 <sup>a</sup>         |                 |                                 |
| MMSE                           | 27.29±2.25                      | 27.66±1.96                         | 0.001                      | <0.0001         | 0.011                           |
| Memory                         | -0.069±0.75                     | 0.012±0.74                         | 0.063                      | <0.0001         | 0.144                           |
| Visuo-spatial ability          | -0.053±0.91                     | 0.003±0.84                         | 0.383                      | 0.003           | 0.006                           |
| Attention                      | -0.054±0.74                     | 0.001±0.79                         | 0.051                      | <0.0001         | 0.300                           |
| Language                       | -0.009±0.89                     | -0.001±0.82                        | 0.143                      | <0.0001         | 0.028                           |
| Executive function             | -0.046±0.85                     | -0.003±0.83                        | 0.292                      | <0.0001         | 0.184                           |

Values are mean±standard deviation or Nos. of participants.

<sup>a</sup>The p-value for sex and MCI status were obtained using  $\chi^2$  test.

visuo-spatial processing, and attention and executive function with similar rapid changes after age 50.

### White matter integrity change with age

Based on the relatively small samples with available MRI data, there were 53 *APOE* ε4 carriers and 58 noncarriers included in white matter analysis (Supplementary Table 1). A main effect of age was found on the anterior fiber bundles, including bilateral anterior thalamic radiation (ATR), and forceps minor (FM). Significant main effect of *APOE* ε4 genotype were found in posterior fiber bundles, including bilateral superior longitudinal fasciculus.temporal part (Figure 2). Among the FA values at each tract, significant *APOE* ε4 genotype and age interaction effects were found in both anterior and posterior fibers, including bilateral cingulum. Hippocampus (Hip.L and Hip.R), FM, and right superior longitudinal fasciculus (SLF.R). Notably, the significant interaction results were not corrected for multiple comparisons and therefore should be regarded as exploratory in nature.

Further linear regression analysis showed that there was a significant age-related decline in Hip.L (carriers  $R^2=0.308$ , noncarriers  $R^2=0.224$ ), Hip.R (carriers  $R^2=0.343$ , noncarriers  $R^2=0.179$ ), FM (carriers  $R^2=0.676$ , noncarriers  $R^2=0.24$ ) and SLF.R (carriers  $R^2=0.394$ , noncarriers  $R^2=0.027$ ) in carriers, which was a slight decrease in noncarriers but not significant (Figure 3).

### Correlation between cognition and white matter integrity

Correlations between each white matter integrity and cognitive score were performed in carriers in low-age and high-age group separately. As illustrated in Figure 4, within the high-age carriers, FA values of Hip.L and Hip.R were significantly correlated with MMSE (Hip.L:  $r=0.45$ ,  $p=0.02$ ; Hip.R:  $r=0.50$ ,  $p=0.008$ ), FA value of FM was significantly correlated with memory ( $r=0.55$ ,  $p=0.005$ ), visuo-spatial ability ( $r=0.56$ ,  $p=0.004$ ), attention ( $r=0.57$ ,  $p=0.004$ ), and language ( $r=0.67$ ,  $p<0.001$ ), FA value of SLF.R was significantly correlated with MMSE ( $r=0.48$ ,  $p=0.01$ ), memory ( $r=0.59$ ,  $p=0.002$ ), attention ( $r=0.58$ ,  $p=0.003$ ), language ( $r=0.63$ ,  $p<0.001$ ), and executive function ( $r=0.46$ ,  $p=0.025$ ). However, there is no significant relationship between white matter integrity and cognitive performance in the low-age carriers. SLF.R-language and FM-language were survived false-discovery rate (FDR) correction for multiple comparisons at a level  $q<0.05$ . Additionally, we found that significant FM-attention and SLF.R-attention correlations in low-age noncarriers and FM-language and FM-Visuo-spatial ability correlations in the high-age noncarriers (Supplementary Table 2).

### DISCUSSION

The current study found that the *APOE* ε4 allele could accelerate the age-related reductions in the general

mental status, memory, language, and executive function in Chinese non-demented elderly through a large sample data. Curvilinear regression analysis found that carriers showed a steeper age-related decline after age 50 in MMSE, attention, language, and executive function and performed worse than noncarriers at almost all ages. Furthermore, the development of memory and visuo-spatial ability remained roughly low

and unchanged after 50 years old in  $\epsilon 4$  carriers. However, most of the cognitive domains began to decline around age 60 in noncarriers, at the ages of 60.1 for general mental status, 56.3 for memory, 60.8 for visuo-spatial processing, and 58.7 for language. Then, we found the interactive effect of *APOE* genotype and age on the white matter integrity of Hip.L, Hip.R, FM and SLF.R across twenty main fasciculi in the brain.

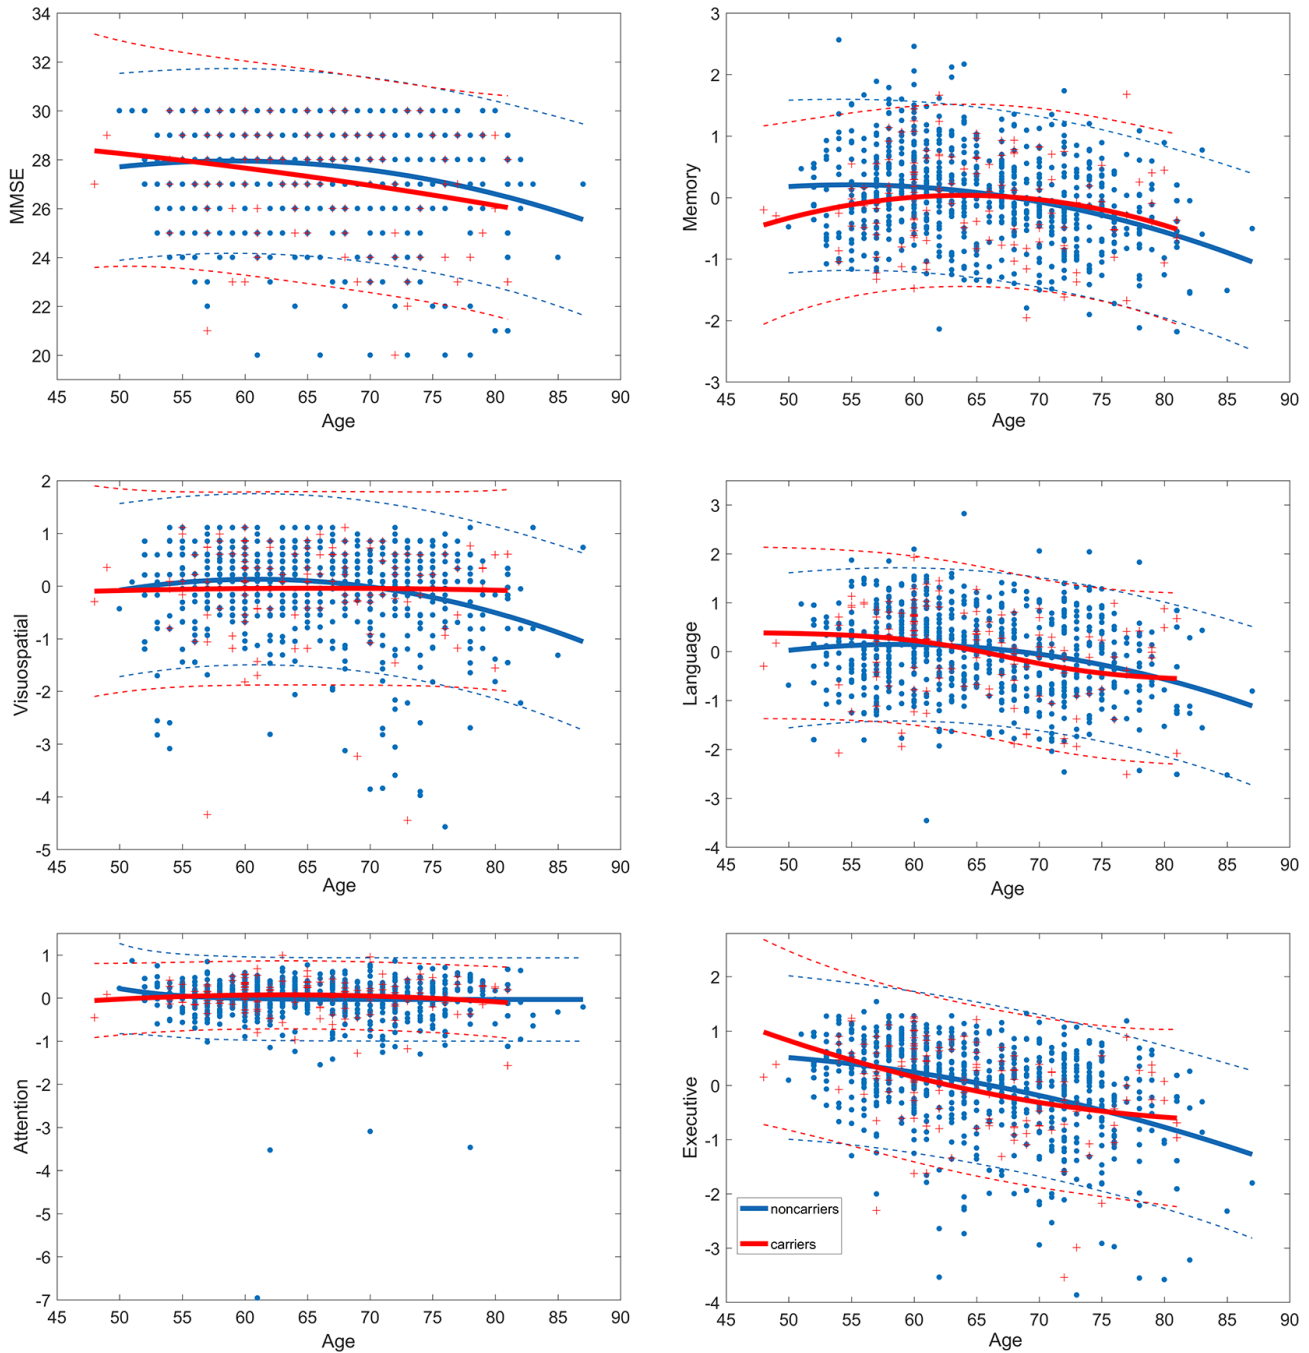

**Figure 1. Trajectories of age-related cognitive change in *APOE*  $\epsilon 4$  carriers and noncarriers.** Dash line represent 95% confidence intervals. MMSE, Mini-Mental State Examination.

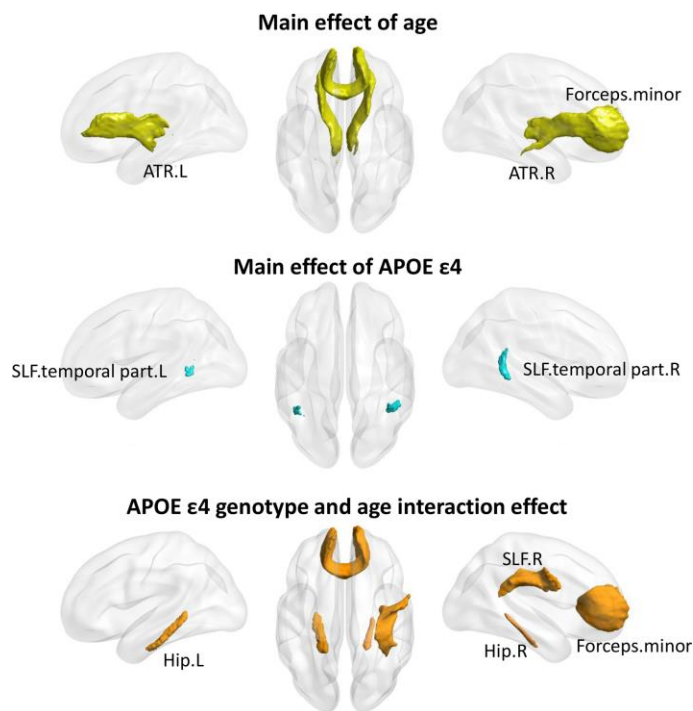

**Figure 2. The age×APOE ε4 effects on fiber bundles.** Significant main effect of age (Top), main effect of APOE ε4 genotype (Middle), and age×APOE ε4 interaction (Bottom) on fibers were found ( $p < 0.05$ , uncorrected). ATR, Anterior thalamic radiation; SLF, Superior longitudinal fasciculus; Hip, cingulum.hippocampus; L, left; R, right.

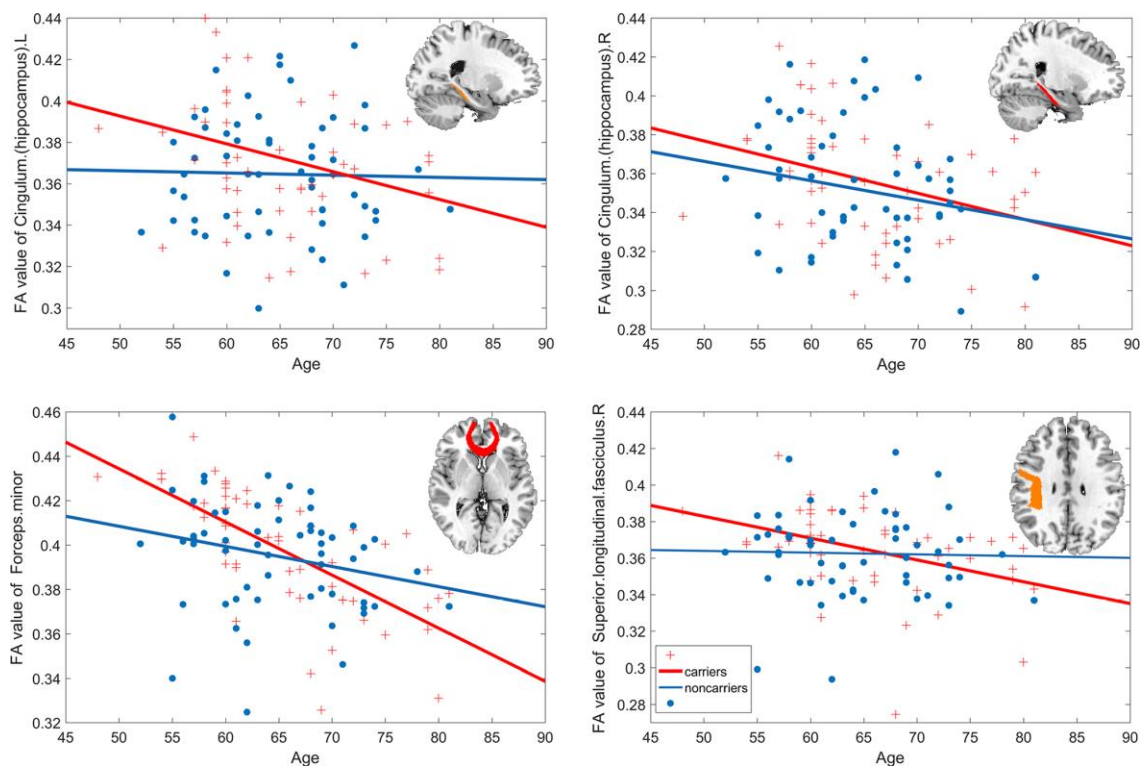

**Figure 3. Age-related white matter integrity decline.** The estimated age trajectories from the linear regression analyses of bilateral cingulum, hippocampus, forceps minor, and right superior longitudinal fasciculus for APOE ε4 carriers (red line) and noncarriers (blue line).

Along with the increasing age, *APOE*  $\epsilon 4$  carriers showed an accelerated integrity reduction of these fibers. Further analysis found significant decline of these fibers in the *APOE*  $\epsilon 4$  carriers but no significant age-related changes in noncarriers. Finally, the correlation analysis found that the changed white matter integrity was associated with cognitive function in high-age  $\epsilon 4$  carriers, but not in low-age carriers.

With simple operation and high sensitivity, the MMSE is always used as an effective tool for the detection for the basic general mental status of patients [20]. Owing to the risk of *APOE*  $\epsilon 4$  allele, the MMSE performance in  $\epsilon 4$  carriers was usually worse than noncarriers [21]. A previous study, stratifying participants by age in three groups (45-54, 55-64, and 65-74 years old), found a significant interactive effect of *APOE* genotype and age on MMSE, that the homozygotes performed worst in the high-age group [22]. When stratifying participants based on a median split (65 years old) in two groups, other researchers did not find any significant interaction of *APOE* genotype and age on cognition [23]. Our findings of the interaction of *APOE* genotype and increasing age on MMSE in the elderly seemed to be favor to reveal the effect of *APOE* genotype on cognition along with age. Additionally, we found *APOE*  $\epsilon 4$  allele could accelerate the age-related reductions in the attention, executive function and language ability, which are main impaired cognitive domains in mild cognitive impairment and early stage of AD [24].

Our study also explored the trajectories of age related cognitive change affected by *APOE* genotype. The cognitive functions were almost unchanged in  $\epsilon 4$  carriers after 50 years old. This is probably due to the effect of  $\epsilon 4$  allele on cognitive functions is already existed before 50 years old. Multiple evidences have supported the deleterious effect of  $\epsilon 4$  allele on memory in young adults and mice [25, 26]. It seems like that the trajectories of cognitive change in noncarriers were more similar to the process of cognitive aging [27].

As an important white matter tract connecting those cingulated subregions and projecting to the entorhinal cortex, the cingulum plays a crucial role in normal aging and AD development [28, 29] and is associated with diverse cognitive functions [30, 31]. The SLF is the longest association fiber in the brain linking bidirectionally the parietal cortex with the frontal cortex, thus providing high-order somatosensory input and information on perception of space to the frontal cortex [32]. The SLF plays an important role in memory [32]. Studies of diffusion tensor imaging (DTI) measures have demonstrated that the FA of SLF decreased in AD patients [33, 34]. The FM, connecting different prefrontal regions, could regulate attention and

executive function [35, 36]. The reduced FA of FM may affect inter-hemispheric communications and may lead to sustained attention deficits [37]. In the current study we found significant interactive effects of *APOE* genotype and age on Hip.L, Hip.R, FM and SLF.R, which may suggest the neural mechanism of *APOE* on cognitive function related with increasing age. On other fasciculi including the frontal, lateral parietal, centrum semiovale, genu and splenium of corpus callosum, and temporal stem, researchers have also found significant interactive effects of *APOE* genotype and age [38]. Otherwise, some negative results have also been reported [39]. In the present study, the effect of gene - age interaction on MD was not significant. Some study showed that FA measure may be more sensitive to AD-related white matter changes than MD to some extent [40].

For the trajectories of age-related FA change, the noncarriers showed almost unchanged whereas the  $\epsilon 4$  carriers showed accelerated age-related integrity reduction after age 50. Similar to the effect of *APOE* genotype on cognitive function, the trajectories of FA in noncarriers were like the aging processing of white matter tracts, which plateaued in the fourth decade and then declined [41]. One possible explanation for the

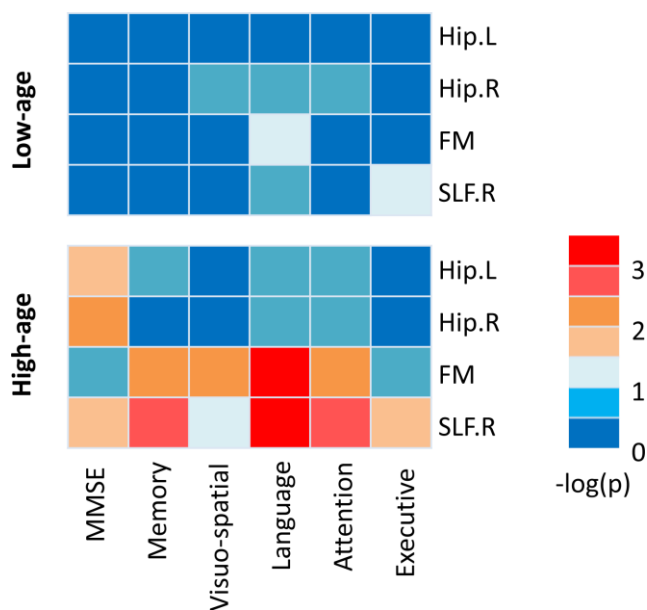

**Figure 4. The relationships between white matter integrity and cognitive performance in *APOE*  $\epsilon 4$  carriers.** A heatmap reflecting  $-\log(P)$  values for correlations between white matter integrity and cognitive performance in low-age (26 subjects, <65years) and high-age (27 subjects,  $\geq 65$ years)  $\epsilon 4$  carriers. Though a number of significant correlations were estimated high-age carriers, no correlation was significant in low-age carriers.

inverted U type trajectories of FA in  $\epsilon 4$  carriers in our study is the concept of genetic buffering, that some protective variants carried by individuals without developing disease buffering the effect of harmful variants. Some evidences from the oldest-old participants have suggested that the  $\epsilon 4$  allele was not related with AD incident and mortality [42].

In the following correlation analysis, we categorized the participants by 65 years old and then assessed the relationship between white matter integrity and cognitive function in  $\epsilon 4$  carriers. We found significant correlation between white matter change and cognitive function in the high-age group. Several studies have indicated that the cingulum is associated with attention [30, 31]. And the SLF is also associated with some cognitive function, like language ability [43] and working memory [44]. Studies also supported the close relationship between the FM and attention and executive function [45, 46]. Our results might suggest that these white matter tracts were distributed in pivotal regions dominant some high-order cognitive functions, thus the demyelination and axonal injury in these white matter could be the neural basis of cognitive deficits.

The APOE gene is associated with Alzheimer's disease, but it cannot predict individual getting it. Case studies have shown tremendous progress with diet, exercise and lifestyle changes for slowing and even reversing symptoms [47, 48]. In the future, we will collect more information about these factors and pay attention to their regulation of APOE risk.

## CONCLUSIONS

In conclusion, the current study described different patterns of age related cognition and white matter integrity in APOE  $\epsilon 4$  carriers and noncarriers. Our findings underscore the importance of integrating age and genetic variants when examining candidate genes for cognitive function and AD. Further prospective studies with a larger sample size and a longitudinal design would permit clarification on our findings and provide more concrete evidence.

## MATERIALS AND METHODS

### Participants

Participants were selected from the Beijing Aging Brain Rejuvenation Initiative study, an ongoing longitudinal study examining the brain and cognitive decline in an elderly, community-dwelling sample [49]. All enrolled participants were Han Chinese, right-handed. The study was approved by the Ethics Committee and institutional review board of Beijing Normal University Imaging

Center for Brain Research, and written informed consent was given by all participants. To be included in this study, participants had to meet the following criteria: (1) clinically non-demented and scored at least 20 on the MMSE; (2) no history of neurologic, psychiatric, or systemic illnesses known to influence cerebral function, including serious vascular diseases, head trauma, tumor, current depression, alcoholism, and epilepsy; (3) no prior history of taking psychoactive medications; (4) a successful blood sample for the genotyping analysis. Specifically, the status "clinically non-demented" was determined by using Dementia, according to the Diagnostic and Statistical Manual of Mental Disorders IV criteria. Accordingly, 846 non-demented subjects (aged 48–87 years; 311 males/535 females) were included in the present study. We diagnosed a participant with MCI according to the previously established criteria [50].

### APOE genotyping

DNA was extracted from the subjects' blood samples according to standard procedures for the subsequent characterization of the APOE genotype using PCR (Applied Biosystems, Foster City, CA). All participants were genotyped for two SNPs in the APOE gene (rs429358 and rs7412) using previously published methods [51]. There were 129 APOE  $\epsilon 4$  carriers (including 123  $\epsilon 3/\epsilon 4$  genotype and 6  $\epsilon 4/\epsilon 4$  genotype) and 717 APOE  $\epsilon 4$  noncarriers (including 602  $\epsilon 3/\epsilon 3$  genotype and 115  $\epsilon 2/\epsilon 3$  genotype) included in our present study.

### Neuropsychological testing

A comprehensive neuropsychological battery was comprised of the following 5 cognition domains with the tests included in parentheses: 1, memory (the Auditory Verbal Learning Test (AVLT), the Rey-Osterrieth Complex Figure test (ROCF) (recall), and the backward Digit Span); 2, attention (the Trail Making Test (TMT)-A, the Symbol Digit Modalities Test (SDMT) and the Stroop Color and Word Test (SCWT)-B); 3, visuo-spatial ability (ROCF (copy), Clock-Drawing Test (CDT)); 4, language (the Category Verbal Fluency Test (CVFT), the Boston Naming Test (BNT)); and 5, executive function (the TMT-B and SCWT-C). The specific neuropsychological test procedures have been described previously [52]. For each cognitive task, raw test scores were converted to z-scores. Next, composite z-scores were calculated for each cognitive domain by averaging z-scores for all cognitive tasks within a cognitive domain.

### MRI data acquisition

Among the participants, 111 subjects (53 APOE  $\epsilon 4$  carriers and 58 noncarriers) received high-quality MRI

scanning, which included a 3D T1-weighted MRI scan and a DTI scan. All participants were scanned with a SIEMENS TRIO 3T scanner in the Imaging Center for Brain Research at Beijing Normal University, including high-resolution T1-weighted structural MRI, and DTI. Participants laid supine with their head fixed snugly by straps and foam pads to minimize head movement. T1-weighted, sagittal 3D magnetization prepared rapid gradient echo (MP-RAGE) sequences were acquired and covered the entire brain [176 sagittal slices, repetition time (TR)=1900 ms, echo time (TE)=3.44 ms, slice thickness=1 mm, flip angle=9°, inversion time=900 ms, field of view (FOV)=256×256 mm<sup>2</sup>, acquisition matrix=256×256]. For each DTI scan, images covering the whole brain were acquired by an echo-planar imaging sequence with the following scan parameters: TR=9500 ms, TE=92 ms, 30 diffusion-weighted directions with a b-value of 1000 s/mm<sup>2</sup>, and a single image with a b-value of 0 s/mm<sup>2</sup>, slice thickness=2 mm, no inter-slice gap, 70 axial slices, acquisition matrix =128×128, FOV=256×256 mm<sup>2</sup>, averages=3.

### Diffusion MRI data processing

DTI data were processed with the FDT toolbox in FSL (<https://www.fmrib.ox.ac.uk/fsl>). First, the DICOM files of all subjects were converted into NIFTI using the dcm2nii tool embedded in MRICron. Second, the brain mask was estimated, and the resulting brain mask was required for the subsequent processing steps. Third, the non-brain spaces in the raw images were cut off leading to a reduced image size, reducing the memory cost and speeding up the processing in subsequent steps. Fourth, each image was coregistered to the b0 image using an affine transformation to correct the eddy-current induced distortions and simple head-motion artifacts. The diffusion gradient directions were adjusted accordingly. Fifth, a voxel-wise calculation of the tensor matrix and the diffusion tensor metrics were yielded for each subject (i.e., the FA).

To identify major white matter tracts, we used the digital WM atlas JHUICBM-DTI-81 (<http://cmrm.med.jhmi.edu/>), a probabilistic atlas generated by mapping the DTI data of 78 subjects to a template image. The atlas contains 20 main WM bundles and has three individual sets of sub-templates with different probability levels in the probability tractography map: 0%, 25% and 50%. In this study, we chose to use the 25% threshold subtemplate, which contains 20 major tracts. The JHU-WM atlas was overlaid on the WM skeleton of each subject in the CBM-DTI-81 space, such that each skeleton voxel could be categorized into one of the major tracts. Then, the mean FA at the skeleton voxels within each tract was calculated.

### Statistical analysis

To evaluate the group difference (*APOE* ε4 carriers vs. noncarriers) in age and education, two-sample t-test were performed. For gender and medical history, Chi-square test was applied. For each cognitive domain, we first tested the *APOE* ε4 genotype and age interaction by using a general linear model (GLM), and then used curvilinear regression models to assess associations between each cognition and age in the *APOE* ε4 carrier and noncarrier separately. For the multiple nodal efficiencies, we applied the FDR procedure to correct the multiple comparisons at a q-value of 0.05.

#### *Associations between cognitive function and age*

We assessed the *APOE* ε4 genotype × age interaction on each cognitive domain (raw MMSE score or composite cognitive domain scores). Specifically, a GLM with “age”, “*APOE* ε4” and “*APOE* ε4 × age” as predictor variables were applied, in which gender and education were included as covariates. Curvilinear regression models were used to assess associations between cognitive functions and age in the *APOE* ε4 carriers and noncarriers respectively. We use linear, quadratic, or sigmoidal regression curve to fit different cognitive functions and judge from the goodness of fit to data ( $R^2$ ).

#### *Fiber diffusion metrics change with age*

The influence of the *APOE* ε4 × age interaction on fiber diffusion metrics (i.e., the FA) at each tract was tested using GLM. Specifically, for each fiber, we applied a GLM with “age”, “*APOE* ε4” and “*APOE* ε4 × age” as predictor variables. Also, gender and education were included as covariates.

#### *Age effect on correlation between fiber diffusion metrics and cognitive functions*

We further investigated how the age influences correlation between the above-identified white matter tracts and the cognitive performance in *APOE* ε4 carriers and noncarriers separately. Since there is no easy way to plot a two-way interaction with two continuous variables (i.e., white matter integrity and age), we first equally divided all carriers or noncarriers into four sub-groups in terms of the rank of age: low-age carriers (26 carriers, <65 years) and high-age carriers (27 carriers, ≥65 years), low-age noncarriers (30 noncarriers, <65 years) and high-age noncarriers (28 noncarriers, ≥65 years). And then calculate the partial correlation of white matter integrity and cognitive scores, accordingly. Gender and education were included as covariates.

### AUTHOR CONTRIBUTIONS

J.S., Z.Z., K.C., Y.C., X.C., and Z.Z. analyzed the data and drafted the manuscript. Y.C., D.W., X.L., J.Z., and



H.L., recruited the study population, conducted the neuropsychological tests and acquired the imaging data. Y.C., and K.C. advised on biostatistical methodology and assisted with analysis of the data. Z.Z. conceived the original idea for the study, supervised in the conception, and revised the manuscript. All authors read and approved the final manuscript.

## ACKNOWLEDGMENTS

We thank all the volunteers for their participation in the study.

## FUNDING

This work was supported by National Key Research and Development Project of China (grant number 2018YFC1315200), National Science Fund for Distinguished Young Scholars (grant number 81625025), Funds for International Cooperation and Exchange of the National Natural Science Foundation of China (grant number 81820108034), State Key Program of National Natural Science of China (grant number 81430100), National Natural Science Foundation of China (grant number 31700997).

## CONFLICTS OF INTEREST

The authors declare that they have no conflicts of interest.

## REFERENCES

1. Jiang T, Yu JT, Tian Y, Tan L. Epidemiology and etiology of alzheimer's disease: from genetic to non-genetic factors. *Curr Alzheimer Res*. 2013; 10:852–67. <https://doi.org/10.2174/15672050113109990155> PMID:23919770
2. Verghese PB, Castellano JM, Holtzman DM. Apolipoprotein E in alzheimer's disease and other neurological disorders. *Lancet Neurol*. 2011; 10:241–52. [https://doi.org/10.1016/S1474-4422\(10\)70325-2](https://doi.org/10.1016/S1474-4422(10)70325-2) PMID:21349439
3. Bookheimer S, Burggren A. APOE-4 genotype and neurophysiological vulnerability to alzheimer's and cognitive aging. *Annu Rev Clin Psychol*. 2009; 5:343–62. <https://doi.org/10.1146/annurev.clinpsy.032408.153625> PMID:19327032
4. Kukull WA, Higdon R, Bowen JD, McCormick WC, Teri L, Schellenberg GD, van Belle G, Jolley L, Larson EB. Dementia and alzheimer disease incidence: a prospective cohort study. *Arch Neurol*. 2002; 59:1737–46. <https://doi.org/10.1001/archneur.59.11.1737> PMID:12433261
5. Stahl R, Dietrich O, Teipel SJ, Hampel H, Reiser MF, Schoenberg SO. White matter damage in alzheimer disease and mild cognitive impairment: assessment with diffusion-tensor MR imaging and parallel imaging techniques. *Radiology*. 2007; 243:483–92. <https://doi.org/10.1148/radiol.2432051714> PMID:17456872
6. Stricker NH, Schweinsburg BC, Delano-Wood L, Wierenga CE, Bangen KJ, Haaland KY, Frank LR, Salmon DP, Bondi MW. Decreased white matter integrity in late-myelinating fiber pathways in alzheimer's disease supports retrogenesis. *Neuroimage*. 2009; 45:10–16. <https://doi.org/10.1016/j.neuroimage.2008.11.027> PMID:19100839
7. Pievani M, Agosta F, Pagani E, Canu E, Sala S, Absinta M, Geroldi C, Ganzola R, Frisoni GB, Filippi M. Assessment of white matter tract damage in mild cognitive impairment and alzheimer's disease. *Hum Brain Mapp*. 2010; 31:1862–75. <https://doi.org/10.1002/hbm.20978> PMID:20162601
8. Nathan BP, Chang KC, Bellosa S, Brisch E, Ge N, Mahley RW, Pitas RE. The inhibitory effect of apolipoprotein E4 on neurite outgrowth is associated with microtubule depolymerization. *J Biol Chem*. 1995; 270:19791–99. <https://doi.org/10.1074/jbc.270.34.19791> PMID:7649988
9. Tesseur I, Van Dorpe J, Spittaels K, Van den Haute C, Moechars D, Van Leuven F. Expression of human apolipoprotein E4 in neurons causes hyperphosphorylation of protein tau in the brains of transgenic mice. *Am J Pathol*. 2000; 156:951–64. [https://doi.org/10.1016/S0002-9440\(10\)64963-2](https://doi.org/10.1016/S0002-9440(10)64963-2) PMID:10702411
10. Bartzokis G, Sultzer D, Lu PH, Nuechterlein KH, Mintz J, Cummings JL. Heterogeneous age-related breakdown of white matter structural integrity: implications for cortical "disconnection" in aging and alzheimer's disease. *Neurobiol Aging*. 2004; 25:843–51. <https://doi.org/10.1016/j.neurobiolaging.2003.09.005> PMID:15212838
11. Bartzokis G, Cummings JL, Sultzer D, Henderson VW, Nuechterlein KH, Mintz J. White matter structural integrity in healthy aging adults and patients with alzheimer disease: a magnetic resonance imaging study. *Arch Neurol*. 2003; 60:393–98. <https://doi.org/10.1001/archneur.60.3.393> PMID:12633151
12. Bartzokis G, Lu PH, Geschwind DH, Edwards N, Mintz J, Cummings JL. Apolipoprotein E genotype and age-

- related myelin breakdown in healthy individuals: implications for cognitive decline and dementia. *Arch Gen Psychiatry*. 2006; 63:63–72.  
<https://doi.org/10.1001/archpsyc.63.1.63>  
PMID:16389198
13. Bartzokis G, Lu PH, Geschwind DH, Tingus K, Huang D, Mendez MF, Edwards N, Mintz J. Apolipoprotein E affects both myelin breakdown and cognition: implications for age-related trajectories of decline into dementia. *Biol Psychiatry*. 2007; 62:1380–87.  
<https://doi.org/10.1016/j.biopsych.2007.03.024>  
PMID:17659264
14. Reas ET, Laughlin GA, Bergstrom J, Kritz-Silverstein D, Barrett-Connor E, McEvoy LK. Effects of APOE on cognitive aging in community-dwelling older adults. *Neuropsychology*. 2019; 33:406–16.  
<https://doi.org/10.1037/neu0000501> PMID:30730162
15. Tucker-Drob EM, Reynolds CA, Finkel D, Pedersen NL. Shared and unique genetic and environmental influences on aging-related changes in multiple cognitive abilities. *Dev Psychol*. 2014; 50:152–66.  
<https://doi.org/10.1037/a0032468> PMID:23586942
16. Finkel D, Pedersen NL, Plomin R, McClearn GE. Longitudinal and cross-sectional twin data on cognitive abilities in adulthood: the swedish adoption/twin study of aging. *Dev Psychol*. 1998; 34:1400–13.  
<https://doi.org/10.1037//0012-1649.34.6.1400>  
PMID:9823519
17. Reynolds CA, Finkel D. A meta-analysis of heritability of cognitive aging: minding the “missing heritability” gap. *Neuropsychol Rev*. 2015; 25:97–112.  
<https://doi.org/10.1007/s11065-015-9280-2>  
PMID:25732892
18. Operto G, Cacciaglia R, Grau-Rivera O, Falcon C, Brugulat-Serrat A, Ródenas P, Ramos R, Morán S, Esteller M, Bargalló N, Molinuevo JL, Gispert JD, and ALFA Study. White matter microstructure is altered in cognitively normal middle-aged APOE-ε4 homozygotes. *Alzheimers Res Ther*. 2018; 10:48.  
<https://doi.org/10.1186/s13195-018-0375-x>  
PMID:29793545
19. Operto G, Molinuevo JL, Cacciaglia R, Falcon C, Brugulat-Serrat A, Suárez-Calvet M, Grau-Rivera O, Bargalló N, Morán S, Esteller M, Gispert JD, and ALFA Study. Interactive effect of age and APOE-ε4 allele load on white matter myelin content in cognitively normal middle-aged subjects. *Neuroimage Clin*. 2019; 24:101983.  
<https://doi.org/10.1016/j.nicl.2019.101983>  
PMID:31520917
20. Perneckzy R. The appropriateness of short cognitive tests for the identification of mild cognitive impairment and mild dementia. *Aktuelle Neurologie*. 2003; 30:114–117.  
<https://doi.org/10.1055/s-2003-38269>
21. Christensen H, Batterham PJ, Mackinnon AJ, Jorm AF, Mack HA, Mather KA, Anstey KJ, Sachdev PS, Eastaer S. The association of APOE genotype and cognitive decline in interaction with risk factors in a 65–69 year old community sample. *BMC Geriatr*. 2008; 8:14.  
<https://doi.org/10.1186/1471-2318-8-14>  
PMID:18620605
22. Shin MH, Kweon SS, Choi JS, Lee YH, Nam HS, Park KS, Kim HN, Song HR, Kim BC, Choi SM, Oh SY, Jeong SK. The effect of an APOE polymorphism on cognitive function depends on age. *J Neurol*. 2014; 261:66–72.  
<https://doi.org/10.1007/s00415-013-7157-y>  
PMID:24146255
23. Gomar JJ, Gordon ML, Dickinson D, Kingsley PB, Uluğ AM, Keehlisen L, Huet S, Buthorn JJ, Koppel J, Christen E, Conejero-Goldberg C, Davies P, Goldberg TE. APOE genotype modulates proton magnetic resonance spectroscopy metabolites in the aging brain. *Biol Psychiatry*. 2014; 75:686–92.  
<https://doi.org/10.1016/j.biopsych.2013.05.022>  
PMID:23831342
24. Belleville S, Fouquet C, Hudon C, Zomahoun HT, Croteau J, and Consortium for the Early Identification of Alzheimer’s disease-Quebec. Neuropsychological measures that predict progression from mild cognitive impairment to alzheimer’s type dementia in older adults: a systematic review and meta-analysis. *Neuropsychol Rev*. 2017; 27:328–53.  
<https://doi.org/10.1007/s11065-017-9361-5>  
PMID:29019061
25. Rodriguez GA, Burns MP, Weeber EJ, Rebeck GW. Young APOE4 targeted replacement mice exhibit poor spatial learning and memory, with reduced dendritic spine density in the medial entorhinal cortex. *Learn Mem*. 2013; 20:256–66.  
<https://doi.org/10.1101/lm.030031.112>  
PMID:23592036
26. Sinclair LI, Button KS, Munafò MR, Day IN, Lewis G. Possible association of APOE genotype with working memory in young adults. *PLoS One*. 2015; 10:e0135894.  
<https://doi.org/10.1371/journal.pone.0135894>  
PMID:26287823
27. Yam A, Gross AL, Prindle JJ, Marsiske M. Ten-year longitudinal trajectories of older adults’ basic and everyday cognitive abilities. *Neuropsychology*. 2014; 28:819–28.  
<https://doi.org/10.1037/neu0000096>  
PMID:24885451

28. Catheline G, Periot O, Amirault M, Braun M, Dartigues JF, Auriacombe S, Allard M. Distinctive alterations of the cingulum bundle during aging and alzheimer's disease. *Neurobiol Aging*. 2010; 31:1582–92. <https://doi.org/10.1016/j.neurobiolaging.2008.08.012> PMID:18829135
29. Yoon B, Shim YS, Lee KS, Shon YM, Yang DW. Region-specific changes of cerebral white matter during normal aging: a diffusion-tensor analysis. *Arch Gerontol Geriatr*. 2008; 47:129–38. <https://doi.org/10.1016/j.archger.2007.07.004> PMID:17764763
30. Nestor PG, Kubicki M, Spencer KM, Niznikiewicz M, McCarley RW, Shenton ME. Attentional networks and cingulum bundle in chronic schizophrenia. *Schizophr Res*. 2007; 90:308–15. <https://doi.org/10.1016/j.schres.2006.10.005> PMID:17150337
31. Schermuly I, Fellgiebel A, Wagner S, Yakushev I, Stoeter P, Schmitt R, Knickenberg RJ, Bleichner F, Beutel ME. Association between cingulum bundle structure and cognitive performance: an observational study in major depression. *Eur Psychiatry*. 2010; 25:355–60. <https://doi.org/10.1016/j.eurpsy.2010.05.001> PMID:20621455
32. Sali D, Verganelakis DA, Gotsis E, Toulas P, Papatriantafillou J, Karageorgiou C, Thomaidis T, Kapsalaki EZ, Hadjigeorgiou G, Papadimitriou A. Diffusion tensor imaging (DTI) in the detection of white matter lesions in patients with mild cognitive impairment (MCI). *Acta Neurol Belg*. 2013; 113:441–51. <https://doi.org/10.1007/s13760-013-0197-3> PMID:23625776
33. Douaud G, Jbabdi S, Behrens TE, Menke RA, Gass A, Monsch AU, Rao A, Whitcher B, Kindlmann G, Matthews PM, Smith S. DTI measures in crossing-fibre areas: increased diffusion anisotropy reveals early white matter alteration in MCI and mild alzheimer's disease. *Neuroimage*. 2011; 55:880–90. <https://doi.org/10.1016/j.neuroimage.2010.12.008> PMID:21182970
34. Rose SE, Chen F, Chalk JB, Zelaya FO, Strugnell WE, Benson M, Semple J, Doddrell DM. Loss of connectivity in alzheimer's disease: an evaluation of white matter tract integrity with colour coded MR diffusion tensor imaging. *J Neurol Neurosurg Psychiatry*. 2000; 69:528–30. <https://doi.org/10.1136/jnnp.69.4.528> PMID:10990518
35. Kraus MF, Susmaras T, Caughlin BP, Walker CJ, Sweeney JA, Little DM. White matter integrity and cognition in chronic traumatic brain injury: a diffusion tensor imaging study. *Brain*. 2007; 130:2508–19. <https://doi.org/10.1093/brain/awm216> PMID:17872928
36. Langner R, Eickhoff SB. Sustaining attention to simple tasks: a meta-analytic review of the neural mechanisms of vigilant attention. *Psychol Bull*. 2013; 139:870–900. <https://doi.org/10.1037/a0030694> PMID:23163491
37. Prasad KM, Upton CH, Schirda CS, Nimgaonkar VL, Keshavan MS. White matter diffusivity and microarchitecture among schizophrenia subjects and first-degree relatives. *Schizophr Res*. 2015; 161:70–75. <https://doi.org/10.1016/j.schres.2014.09.045> PMID:25454798
38. Ryan L, Walther K, Bendlin BB, Lue LF, Walker DG, Glisky EL. Age-related differences in white matter integrity and cognitive function are related to APOE status. *Neuroimage*. 2011; 54:1565–77. <https://doi.org/10.1016/j.neuroimage.2010.08.052> PMID:20804847
39. Heise V, Filippini N, Ebmeier KP, Mackay CE. The APOE ε4 allele modulates brain white matter integrity in healthy adults. *Mol Psychiatry*. 2011; 16:908–16. <https://doi.org/10.1038/mp.2010.90> PMID:20820167
40. Gold BT, Powell DK, Andersen AH, Smith CD. Alterations in multiple measures of white matter integrity in normal women at high risk for alzheimer's disease. *Neuroimage*. 2010; 52:1487–94. <https://doi.org/10.1016/j.neuroimage.2010.05.036> PMID:20493952
41. Westlye LT, Walhovd KB, Dale AM, Bjørnerud A, Due-Tønnessen P, Engvig A, Grydeland H, Tamnes CK, Ostby Y, Fjell AM. Life-span changes of the human brain white matter: diffusion tensor imaging (DTI) and volumetry. *Cereb Cortex*. 2010; 20:2055–68. <https://doi.org/10.1093/cercor/bhp280> PMID:20032062
42. Corrada MM, Paganini-Hill A, Berlau DJ, Kawas CH. Apolipoprotein E genotype, dementia, and mortality in the oldest old: the 90+ study. *Alzheimers Dement*. 2013; 9:12–18. <https://doi.org/10.1016/j.jalz.2011.12.004> PMID:23123227
43. Madhavan KM, McQueeney T, Howe SR, Shear P, Szaflarski J. Superior longitudinal fasciculus and language functioning in healthy aging. *Brain Res*. 2014; 1562:11–22. <https://doi.org/10.1016/j.brainres.2014.03.012> PMID:24680744
44. Rizio AA, Diaz MT. Language, aging, and cognition: frontal aslant tract and superior longitudinal fasciculus

- contribute toward working memory performance in older adults. *Neuroreport*. 2016; 27:689–93.  
<https://doi.org/10.1097/WNR.0000000000000597>  
PMID:27138951
45. Duering M, Gesierich B, Seiler S, Pirpamer L, Gonik M, Hofer E, Jouvent E, Duchesnay E, Chabriat H, Ropele S, Schmidt R, Dichgans M. Strategic white matter tracts for processing speed deficits in age-related small vessel disease. *Neurology*. 2014; 82:1946–50.  
<https://doi.org/10.1212/WNL.0000000000000475>  
PMID:24793184
46. van Ewijk H, Heslenfeld DJ, Zwiers MP, Buitelaar JK, Oosterlaan J. Diffusion tensor imaging in attention deficit/hyperactivity disorder: a systematic review and meta-analysis. *Neurosci Biobehav Rev*. 2012; 36:1093–106.  
<https://doi.org/10.1016/j.neubiorev.2012.01.003>  
PMID:22305957
47. Dose J, Huebbe P, Nebel A, Rimbach G. APOE genotype and stress response - a mini review. *Lipids Health Dis*. 2016; 15:121.  
<https://doi.org/10.1186/s12944-016-0288-2>  
PMID:27457486
48. Swaminathan A, Jicha GA. Nutrition and prevention of alzheimer's dementia. *Front Aging Neurosci*. 2014; 6:282.  
<https://doi.org/10.3389/fnagi.2014.00282>  
PMID:25368575
49. Li X, Ma C, Zhang J, Liang Y, Chen Y, Chen K, Wang J, Zhang Z, Wang Y, and Beijing Ageing Brain Rejuvenation Initiative. Prevalence of and potential risk factors for mild cognitive impairment in community-dwelling residents of Beijing. *J Am Geriatr Soc*. 2013; 61:2111–9.  
<https://doi.org/10.1111/jgs.12552>  
PMID:24479143
50. Petersen RC. Mild cognitive impairment as a diagnostic entity. *J Intern Med*. 2004; 256:183–94.  
<https://doi.org/10.1111/j.1365-2796.2004.01388.x>  
PMID:15324362
51. Felsky D, Voineskos AN, Lerch JP, Nazeri A, Shaikh SA, Rajji TK, Mulsant BH, Kennedy JL. Myelin-associated glycoprotein gene and brain morphometry in schizophrenia. *Front Psychiatry*. 2012; 3:40.  
<https://doi.org/10.3389/fpsy.2012.00040>  
PMID:22563322
52. Chen Y, Chen K, Zhang J, Li X, Shu N, Wang J, Zhang Z, Reiman EM. Disrupted functional and structural networks in cognitively normal elderly subjects with the APOE ε4 allele. *Neuropsychopharmacology*. 2015; 40:1181–91.  
<https://doi.org/10.1038/npp.2014.302>  
PMID:25403724

## SUPPLEMENTARY MATERIALS

### Supplementary Tables

Supplementary Table 1. Demographic and neuropsychological tests of white matter analysis sample.

|                       | <i>APOE</i> ε4<br>carriers(n=53) | <i>APOE</i> ε4<br>noncarriers<br>(n=58) | Main <i>APOE</i><br>ε4 effect | Main age<br>effect | Age× <i>APOE</i> ε4<br>interaction |
|-----------------------|----------------------------------|-----------------------------------------|-------------------------------|--------------------|------------------------------------|
| Male/Female           | 22/31                            | 29/29                                   | 0.45 <sup>a</sup>             |                    |                                    |
| Age (years)           | 65.53±7.71                       | 64.72±6.52                              | 0.55                          |                    |                                    |
| Education (years)     | 11.79±3.08                       | 11.07±3.37                              | 0.24                          |                    |                                    |
| General mental status | 27.19±2.48                       | 27.74±1.61                              | 0.39                          | 0.12               | 0.45                               |
| Memory                | 0.088±0.84                       | -0.061±0.66                             | 0.63                          | 0.02               | 0.68                               |
| Visuo-spatial ability | 0.042±0.79                       | 0.095±0.64                              | 0.80                          | 0.002              | <0.0001                            |
| Attention             | 0.051±0.73                       | -0.006±0.71                             | 0.52                          | 0.23               | 0.36                               |
| Language              | 0.124±0.85                       | 0.022±0.77                              | 0.70                          | 0.103              | 0.06                               |
| Executive function    | 0.139±0.63                       | -0.106±0.91                             | 0.735                         | 0.201              | 0.61                               |

Values are mean±standard deviation or Nos. of participants.

Supplementary Table 2. Correlation between cognition and white matter integrity in noncarriers.

|   | Hip.L  | Hip.R  | FM                | SLF.R        |
|---|--------|--------|-------------------|--------------|
| r | 0.187  | 0.229  | -0.217            | -0.001       |
| p | 0.352  | 0.250  | 0.277             | 0.996        |
| r | 0.064  | -0.013 | -0.234            | -0.118       |
| p | 0.750  | 0.949  | 0.241             | 0.558        |
| r | 0.139  | 0.242  | -0.010            | 0.216        |
| p | 0.491  | 0.224  | 0.962             | 0.280        |
| r | -0.068 | 0.127  | 0.197             | 0.288        |
| p | 0.737  | 0.528  | 0.326             | 0.145        |
| r | 0.078  | 0.204  | <b>0.572</b>      | <b>0.447</b> |
| p | 0.698  | 0.308  | <b>0.002</b>      | <b>0.019</b> |
| r | 0.197  | 0.057  | 0.370             | 0.367        |
| p | 0.326  | 0.779  | 0.057             | 0.060        |
| r | -0.193 | -0.330 | 0.389             | 0.081        |
| p | 0.367  | 0.115  | 0.060             | 0.705        |
| r | -0.137 | -0.179 | 0.215             | -0.229       |
| p | 0.522  | 0.404  | 0.312             | 0.281        |
| r | -0.097 | -0.131 | <b>0.706</b>      | 0.276        |
| p | 0.652  | 0.543  | <b>&lt;0.0001</b> | 0.191        |
| r | -0.095 | -0.188 | <b>0.515</b>      | 0.095        |
| p | 0.659  | 0.378  | <b>0.010</b>      | 0.658        |
| r | 0.153  | -0.296 | 0.374             | -0.087       |
| p | 0.474  | 0.161  | 0.072             | 0.686        |
| r | 0.072  | -0.383 | 0.072             | -0.180       |
| p | 0.739  | 0.064  | 0.739             | 0.401        |
