# Supplementary material for: APOE ε4 allele accelerates age-related multi-cognitive decline and white matter damage in non-demented elderly
Source: publisher site journal article supplement (doi:10.18632/aging.103367), 2020-06-22
Supplement: Supplementary file [file aging-v12i12-103367-supplementary-material-SD1.pdf]

## SUPPLEMENTARY TABLES

**Supplementary Table 1. Demographic and neuropsychological tests of white matter analysis sample.**

|                       | <i>APOE</i> ε4<br>carriers(n=53) | <i>APOE</i> ε4<br>noncarriers<br>(n=58) | Main <i>APOE</i><br>ε4 effect | Main age<br>effect | Age× <i>APOE</i> ε4<br>interaction |
|-----------------------|----------------------------------|-----------------------------------------|-------------------------------|--------------------|------------------------------------|
| Male/Female           | 22/31                            | 29/29                                   | 0.45 <sup>a</sup>             |                    |                                    |
| Age (years)           | 65.53±7.71                       | 64.72±6.52                              | 0.55                          |                    |                                    |
| Education (years)     | 11.79±3.08                       | 11.07±3.37                              | 0.24                          |                    |                                    |
| General mental status | 27.19±2.48                       | 27.74±1.61                              | 0.39                          | 0.12               | 0.45                               |
| Memory                | 0.088±0.84                       | -0.061±0.66                             | 0.63                          | 0.02               | 0.68                               |
| Visuo-spatial ability | 0.042±0.79                       | 0.095±0.64                              | 0.80                          | 0.002              | <0.0001                            |
| Attention             | 0.051±0.73                       | -0.006±0.71                             | 0.52                          | 0.23               | 0.36                               |
| Language              | 0.124±0.85                       | 0.022±0.77                              | 0.70                          | 0.103              | 0.06                               |
| Executive function    | 0.139±0.63                       | -0.106±0.91                             | 0.735                         | 0.201              | 0.61                               |

Values are mean±standard deviation or Nos. of participants.

**Supplementary Table 2. Correlation between cognition and white matter integrity in noncarriers.**

|                         |               |   | Hip.L  | Hip.R  | FM                | SLF.R        |
|-------------------------|---------------|---|--------|--------|-------------------|--------------|
| Low-age<br>noncarriers  | MMSE          | r | 0.187  | 0.229  | -0.217            | -0.001       |
|                         |               | p | 0.352  | 0.250  | 0.277             | 0.996        |
|                         | memory        | r | 0.064  | -0.013 | -0.234            | -0.118       |
|                         |               | p | 0.750  | 0.949  | 0.241             | 0.558        |
|                         | Visuo-spatial | r | 0.139  | 0.242  | -0.010            | 0.216        |
|                         |               | p | 0.491  | 0.224  | 0.962             | 0.280        |
|                         | language      | r | -0.068 | 0.127  | 0.197             | 0.288        |
|                         |               | p | 0.737  | 0.528  | 0.326             | 0.145        |
|                         | attention     | r | 0.078  | 0.204  | <b>0.572</b>      | <b>0.447</b> |
|                         |               | p | 0.698  | 0.308  | <b>0.002</b>      | <b>0.019</b> |
|                         | executive     | r | 0.197  | 0.057  | 0.370             | 0.367        |
|                         |               | p | 0.326  | 0.779  | 0.057             | 0.060        |
| High-age<br>noncarriers | MMSE          | r | -0.193 | -0.330 | 0.389             | 0.081        |
|                         |               | p | 0.367  | 0.115  | 0.060             | 0.705        |
|                         | memory        | r | -0.137 | -0.179 | 0.215             | -0.229       |
|                         |               | p | 0.522  | 0.404  | 0.312             | 0.281        |
|                         | Visuo-spatial | r | -0.097 | -0.131 | <b>0.706</b>      | 0.276        |
|                         |               | p | 0.652  | 0.543  | <b>&lt;0.0001</b> | 0.191        |
|                         | language      | r | -0.095 | -0.188 | <b>0.515</b>      | 0.095        |
|                         |               | p | 0.659  | 0.378  | <b>0.010</b>      | 0.658        |
|                         | attention     | r | 0.153  | -0.296 | 0.374             | -0.087       |
|                         |               | p | 0.474  | 0.161  | 0.072             | 0.686        |
|                         | executive     | r | 0.072  | -0.383 | 0.072             | -0.180       |
|                         |               | p | 0.739  | 0.064  | 0.739             | 0.401        |
